# Supplementary material for: TFEB activation hallmarks antigenic experience of B lymphocytes and directs germinal center fate decisions
Source: PubMed Central journal article supplement (PMC11322606; doi:10.1038/s41467-024-51166-3), 2024-08-14
Supplement: 41467_2024_51166_MOESM1_ESM.pdf [file 41467_2024_51166_MOESM1_ESM.pdf]

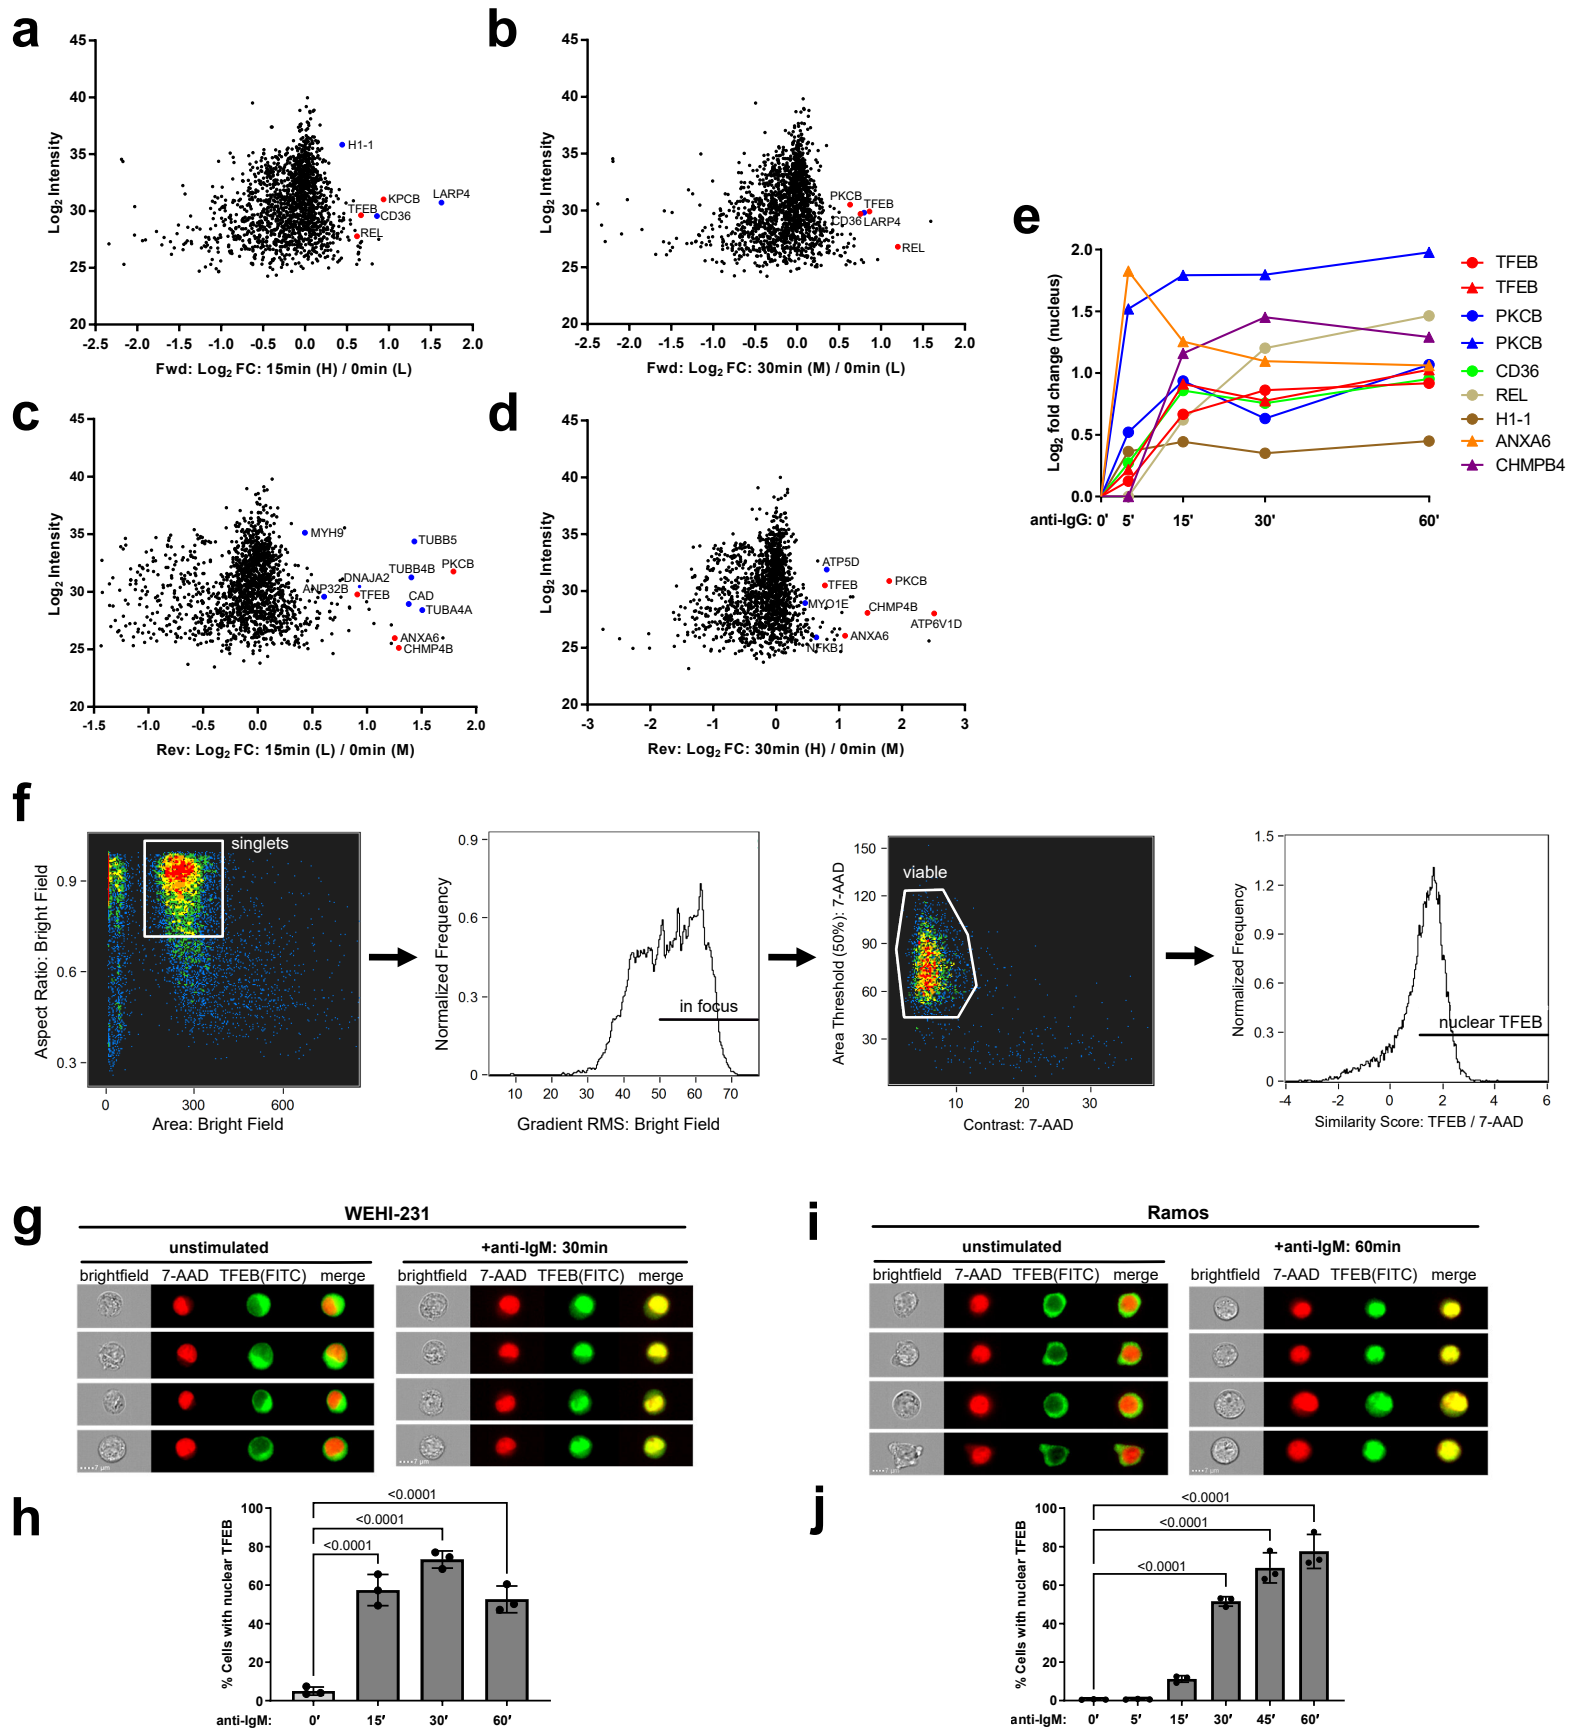

**Supplementary Fig. 1 | Proteomic replicates of the SILAC-based nuclear translocatome analysis and BCR-induced nuclear translocation of TFEB in B cell lines. (a-d)** Scatter plots of identified proteins in the nuclear extracts of the proteomic replicate approach **(a-b)** forward labelling (Fwd) and **(c-d)** reverse labelling (Rev) represented as the log<sub>2</sub>-fold enrichment ('SILAC ratios') at the depicted time points, plotted against the log<sub>2</sub> signal intensity. Proteins significantly enriched at two timepoints are highlighted in blue, significantly enriched proteins at  $\geq 3$  time points are marked red. **(e)** Nuclear translocation kinetics of significantly enriched proteins in the proteomic replicate approach detected at all time points. Proteins detected in the forward experiment are depicted as circles, proteins identified in the reverse experiment are represented as triangles. **(f)** Gating strategy for the assessment of nuclear translocation of TFEB via imaging flow cytometry: Single cells were gated according to their size (Area) and roundness (Aspect Ratio). Focused cells were defined as having a Gradient RMS value  $>50$ . Single cells in focus were further gated according to their double-positive staining of TFEB (FITC) and the nucleus (7-AAD). Apoptotic cells were excluded using the 'apoptosis algorithm' (IDEAS software), analyzing the nuclear staining signal. Nuclear translocation of TFEB in viable cells was finally determined using the 'nuclear translocation algorithm' (IDEAS software) on the channels depicting the TFEB (FITC) and nuclear signal (7-AAD) with a similarity score  $\geq 1$ . **(g-h)** Resting or BCR-stimulated WEHI-231 B cells (30 min) and **(i-j)** Ramos B cells (60 min) (both n=3) were analyzed for the subcellular distribution of TFEB by imaging flow cytometry as described above and is depicted **(g and i)** as representative images of individual cells and as **(h and j)** mean $\pm$ SD percentages of translocation-positive cells. Source data are provided as a Source Data file.

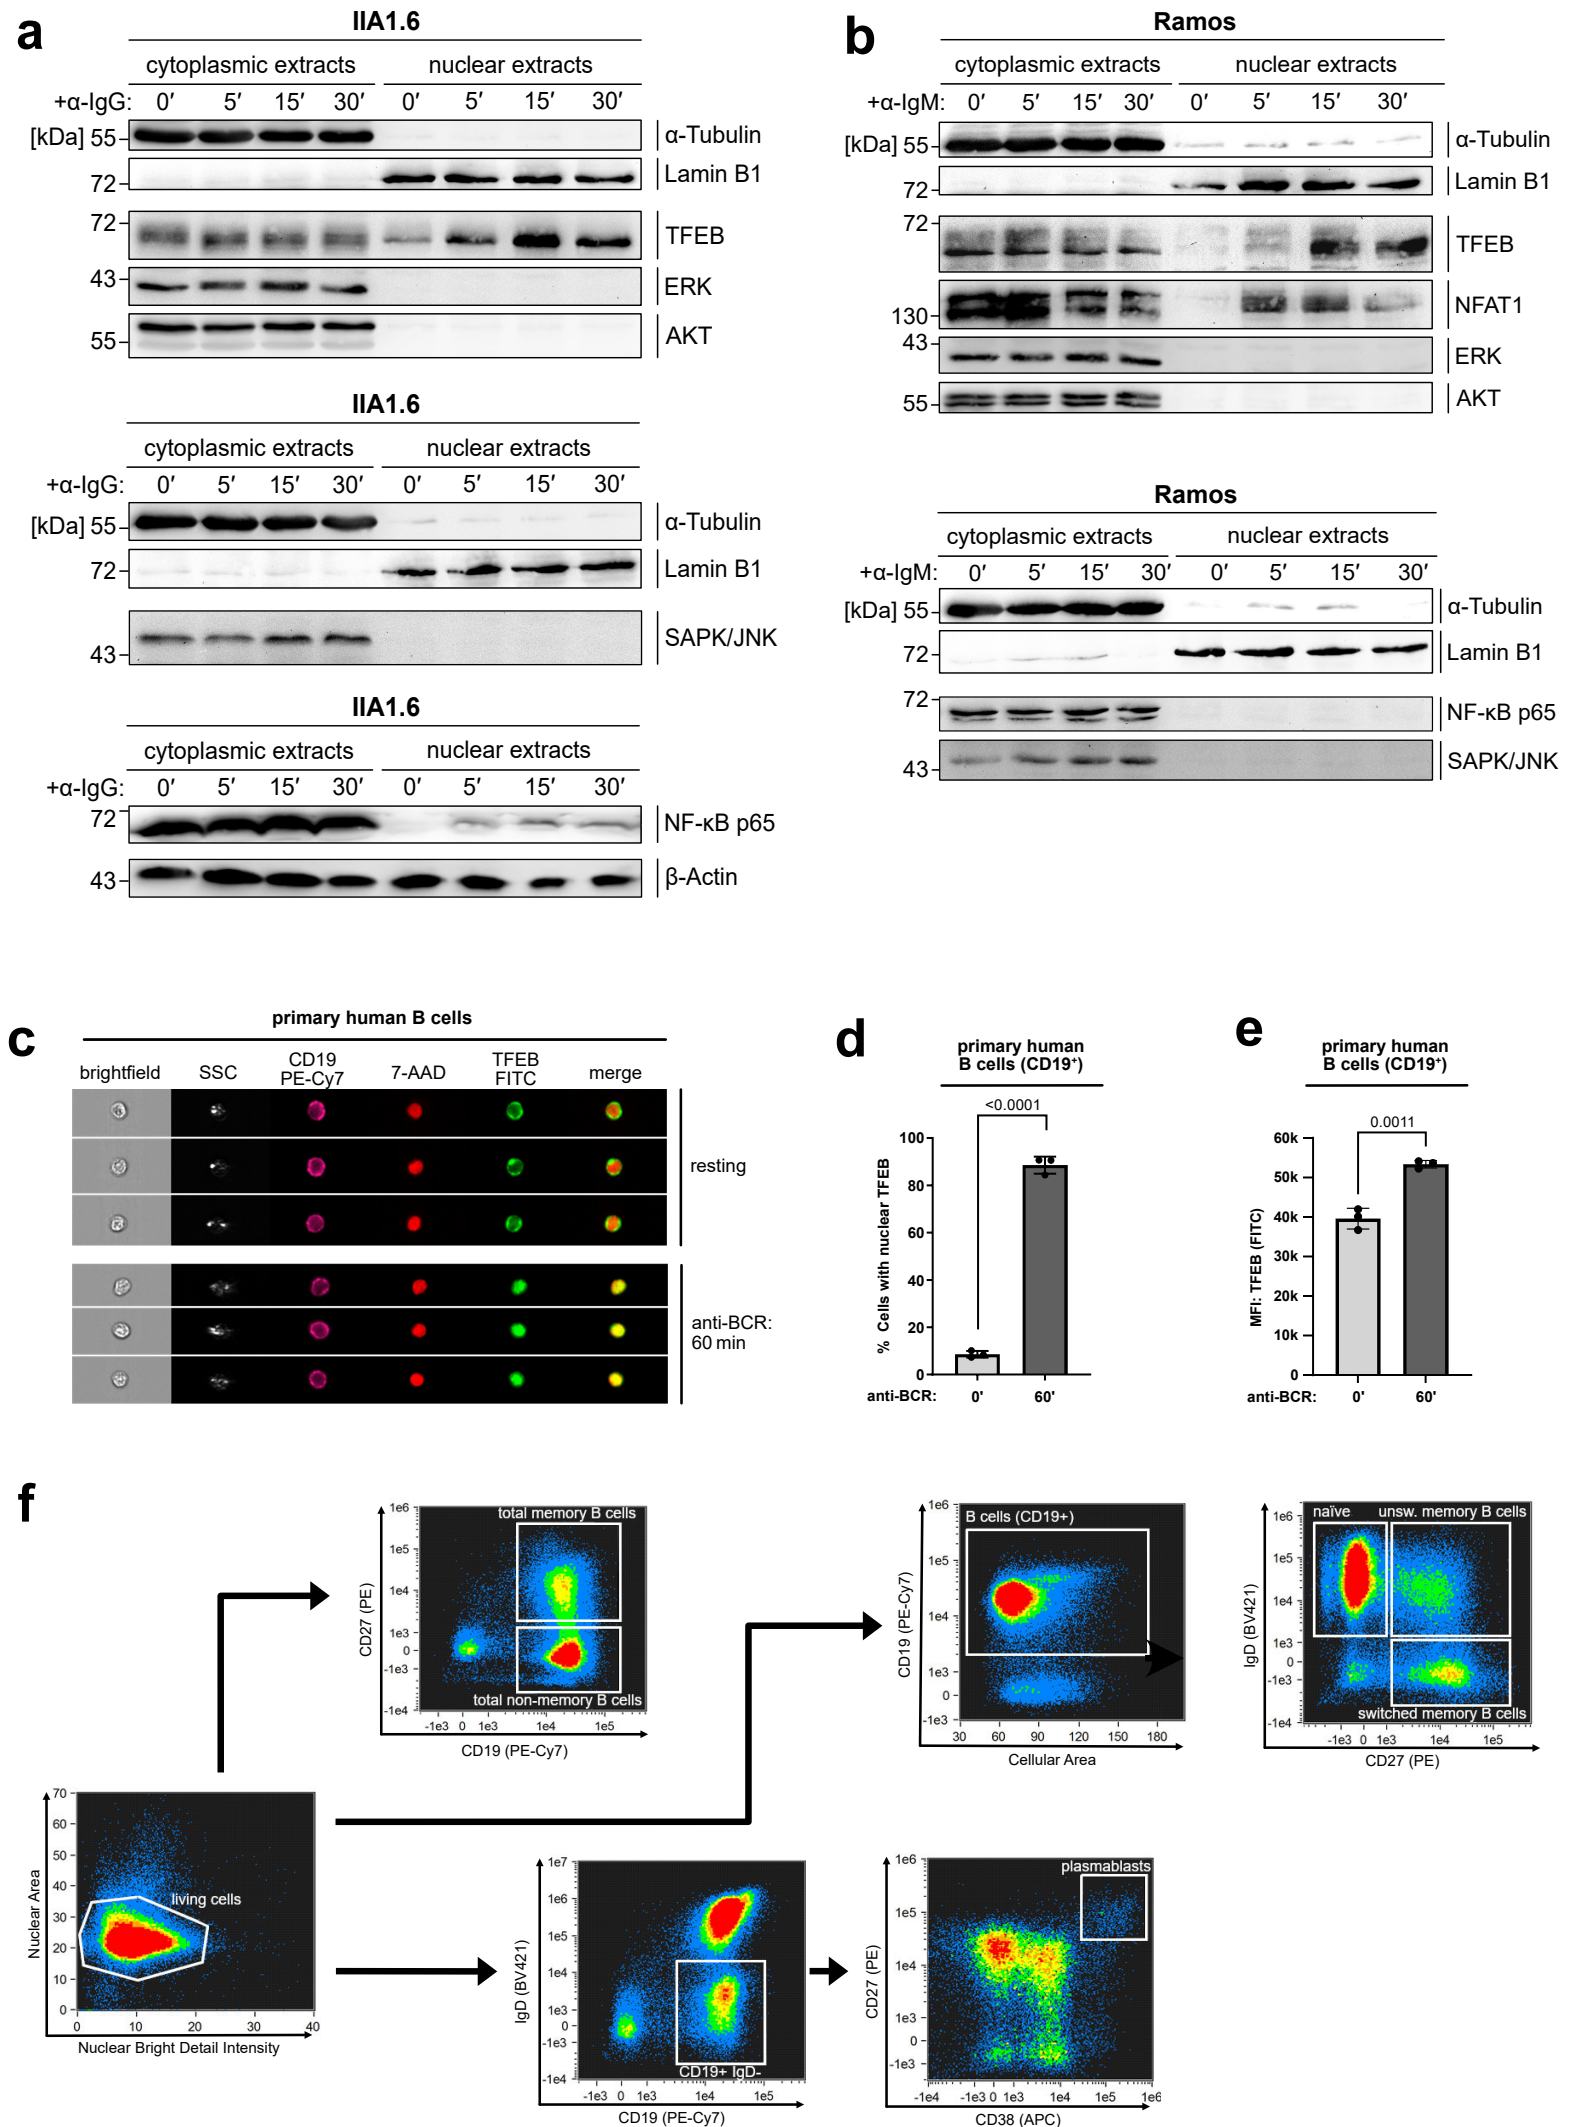

**Supplementary Fig. 2 | Imaging and biochemical monitoring of the nuclear translocation of various B cell effector proteins.** (a-b) Resting or BCR-activated IIA1.6 (a) or Ramos (b) B cells were subjected to subcellular fractionation via lysis gradient centrifugation. Cytosolic and nuclear fractions were separated by SDS-PAGE and subjected to Western Blot analysis using antibodies recognizing the signaling proteins indicated on the right. Relative molecular masses of marker proteins are indicated on the left in kDa and anti- $\beta$ -actin staining was used to confirm equal protein loading. (c-e) Primary human pan-B cells were isolated from the blood of healthy donors and left untreated or BCR-stimulated for 60 min. TFEB nuclear translocation (c-d) and TFEB expression (e) of the CD19-positive fraction was analyzed by imaging flow cytometry. Nuclear TFEB was defined by mean similarity scores of TFEB versus 7-AAD. Data are depicted as mean $\pm$ SD of three independent experiments. (f) Multi-color imaging flow cytometric gating strategy of human B cell subsets: Single, focused cells were gated according to their size ('Area') and roundness ('Aspect Ratio'). Upon exclusion of apoptotic and out-of-focus cells (not shown), total non-memory B cells (CD19<sup>+</sup>CD27<sup>-</sup>), total-memory (CD19<sup>+</sup>CD27<sup>+</sup>), naïve (CD19<sup>+</sup>CD27<sup>-</sup>IgD<sup>+</sup>), unswitched memory (CD19<sup>+</sup>CD27<sup>+</sup>IgD<sup>+</sup>), switched memory (CD19<sup>+</sup>CD27<sup>+</sup>IgD<sup>-</sup>) and plasmablasts (CD19<sup>+</sup>CD27<sup>+</sup>IgD<sup>-</sup>CD38<sup>+</sup>) were distinguished by differential expression of the surface markers CD19, CD27, CD38 and IgD. Source data are provided as a Source Data file.

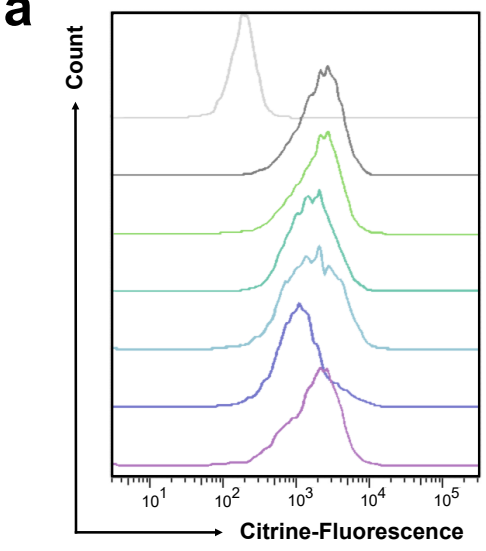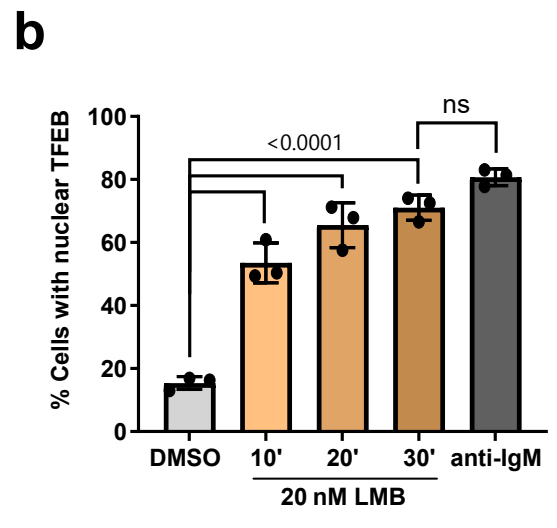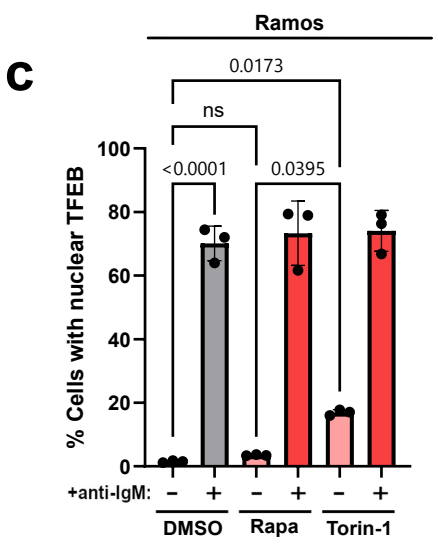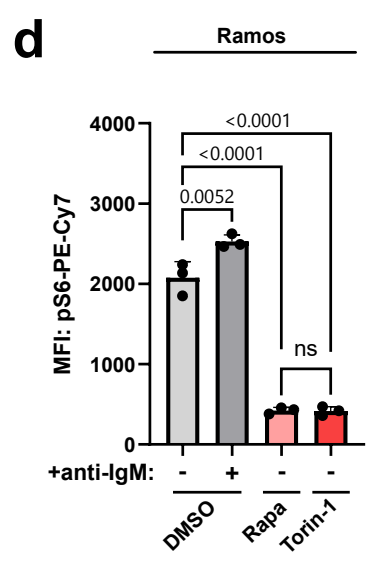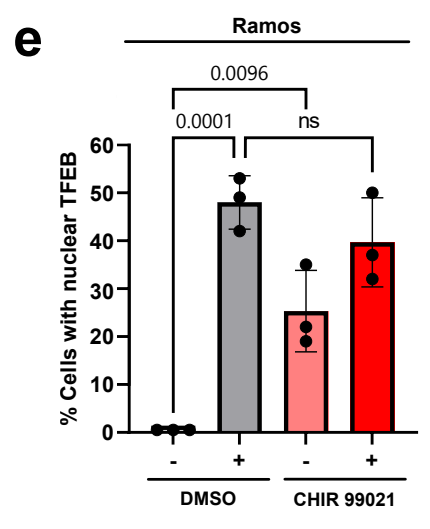

**Supplementary Fig. 3 | Assessment of the regulatory signal network underlying TFEB translocation.** (a) Wild-type Ramos cells were retrovirally transduced with citrine-tagged full-length human TFEB or mutated variants of TFEB. Equal expression of the citrine-TFEB fusion protein was confirmed via flow cytometry. (b) Ramos B cells were left untreated (-), treated with 20 nM leptomycin B (LMB) for the indicated time periods or BCR-activated and the nuclear translocation of TFEB was monitored by imaging flow cytometry as defined by mean similarity score of TFEB/7-AAD. (c-e) Wild-type Ramos B cells were left untreated (-) or BCR-activated (+, 60 min) in the presence of the indicated pharmacological agents: rapamycin (mTOR inhibitor), torin-1 (ATP-competitive mTOR inhibitor) or CHIR 99021 (GSK3 inhibitor). Each of the inhibitors were added to the cells 15 min before BCR ligation and were controlled by treatment of the cells with 1% DMSO. Nuclear TFEB was defined by mean similarity scores of TFEB versus 7-AAD. (c-d) Impact of inhibition of mTOR on the nuclear translocation of TFEB as defined by mean similarity scores of TFEB versus 7-AAD (c) and on TFEB expression (d). (e) Impact of GSK3 inhibition on the nuclear localization of TFEB. Data are depicted as mean $\pm$ SD of n=3 independent experiments. Statistical significances were computed using one-way (b) or two-way (c-e) ANOVA and corrected for multiple testing via Tukey's method. Source data are provided as a Source Data file.

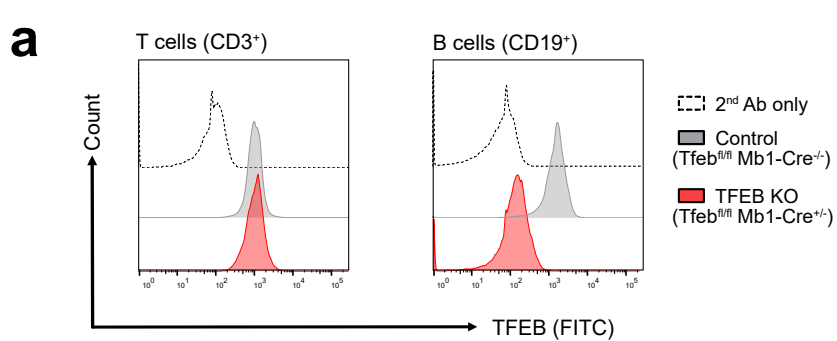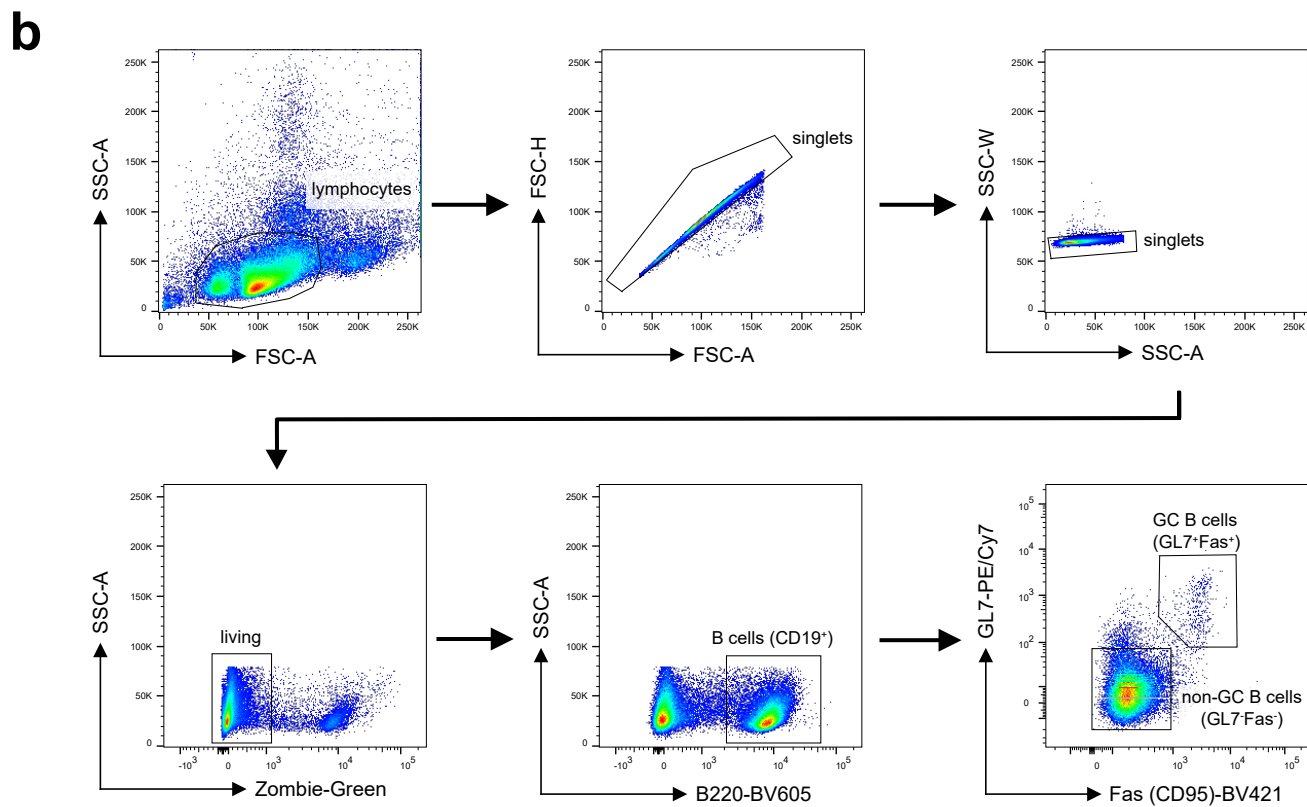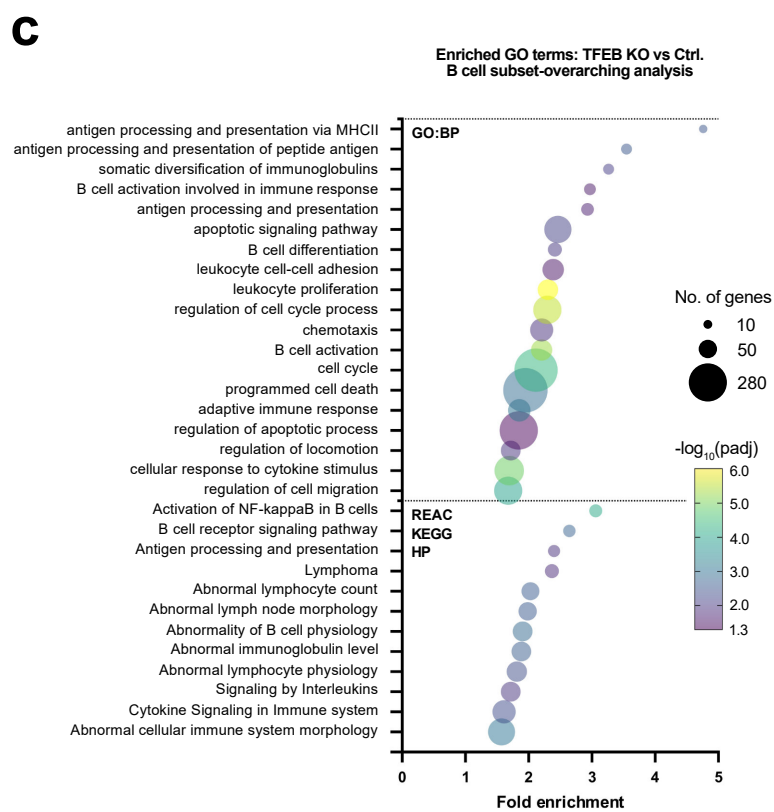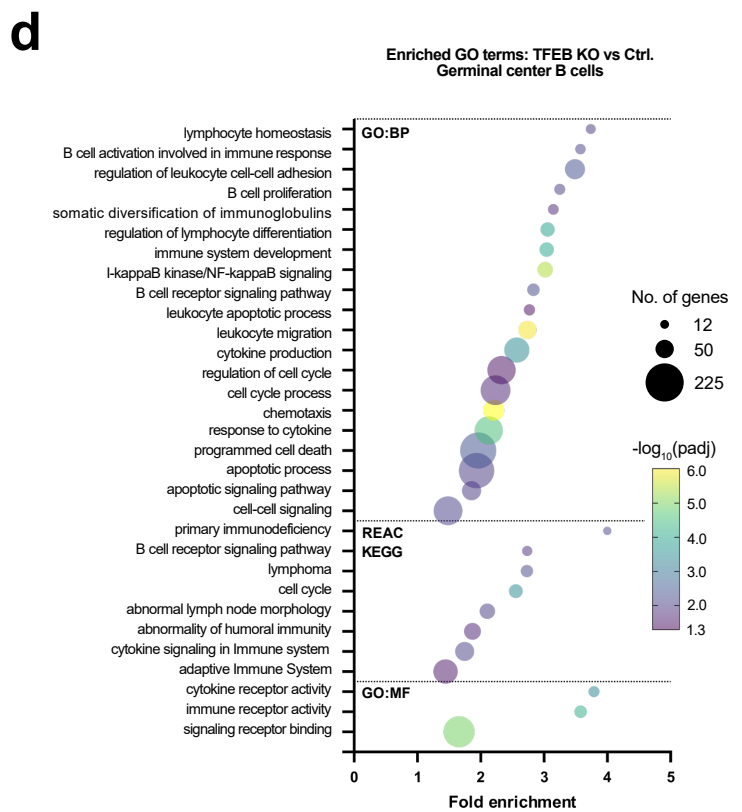

**Supplementary Fig. 4 | Gene ontology mapping of TFEB-dependent transcripts in B cells.**

**(a)** Splenic T cells and B cells from conditional TFEB-deficient mice and control littermates were isolated and analyzed for TFEB expression via flow cytometry. **(b-d)** Splenocytes from age-matched TFEB KO and control littermates were sorted into CD19<sup>+</sup>Fas<sup>+</sup>GL7<sup>+</sup> germinal center (GC) B cells and CD19<sup>+</sup>Fas<sup>-</sup>GL7<sup>-</sup> non-GC B cells and subjected to RNA isolation and bulk RNA sequencing. **(b)** Gating strategy for germinal center and non-GC B cell sorting for RNA sequencing. **(c-d)** Deregulated genes found in the subtype-overarching RNAseq analysis of TFEB-depleted primary B cells, defined as having a  $qval < 0.05$ , as well as TFEB-dependent DEGs found in murine germinal center B cells, defined by a  $padj < 0.05$ , were subjected to gene ontology mapping and GO term enrichment analysis using the g:Profiler application. Selected significantly enriched GO terms from the categories “biological process; GO:BP”, “molecular function; GO:MF”, “biological process; GO:BP”, “Reactome database; REAC”, “Kyoto Encyclopedia of Genes and Genomes database; KEGG”, “human phenotype database; HP” are depicted for the cell type-overarching **(c)** and germinal center B cell analysis **(d)**. The numbers of genes assigned to the respective GO term is illustrated by bubble size, while the  $-\log_{10}$  of the adjusted p value is represented through a color gradient. Source data are provided as a Source Data file.



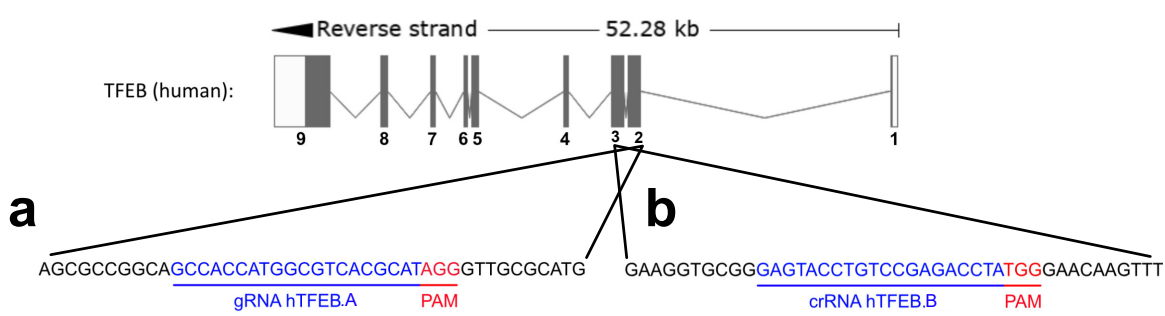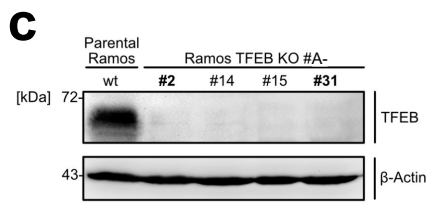

Total screened clones: 39  
TFEB-deficient according to blot: 7  
⇒ Efficiency: 17.9%

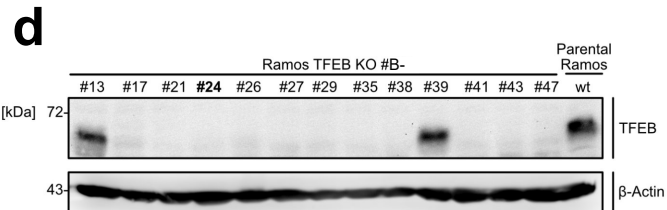

Total screened clones: 48  
TFEB-deficient according to blot: 12  
⇒ Efficiency: 25.0%

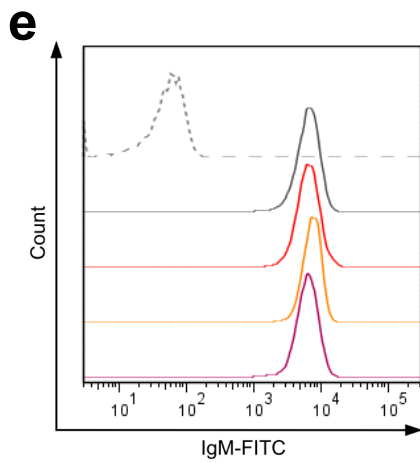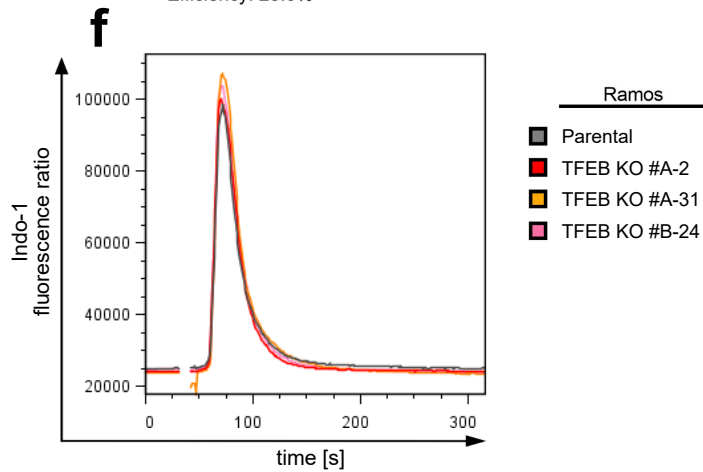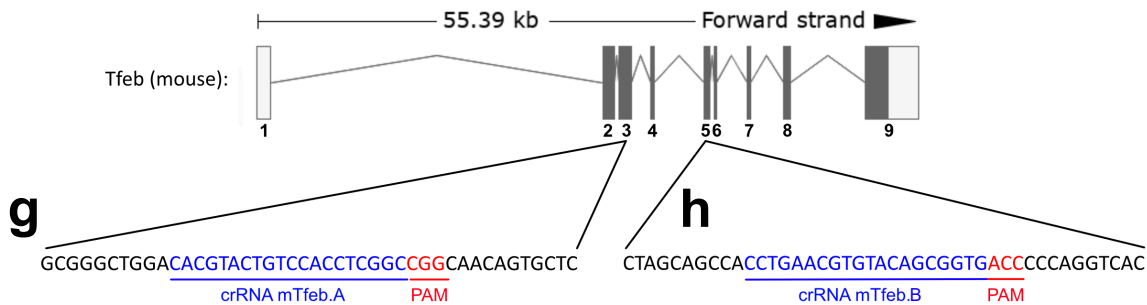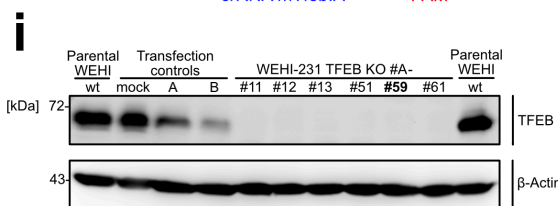

Total screened clones: 47  
TFEB-deficient according to blot: 6  
⇒ Efficiency: 12.8%

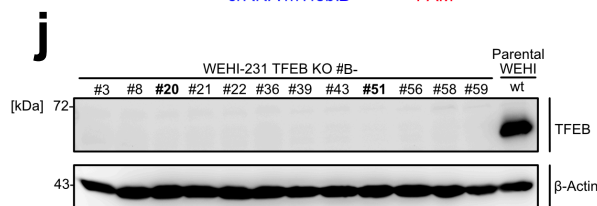

Total screened clones: 52  
TFEB-deficient according to blot: 12  
⇒ Efficiency: 23.1%

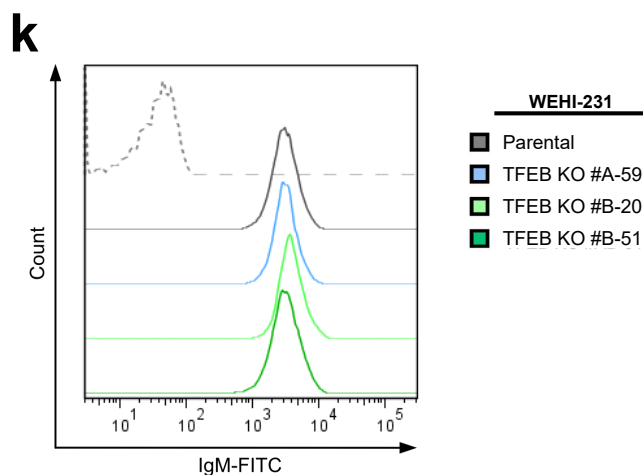

**Supplementary Fig. 5 | Generation of TFEB-deficient B cell clones by CRISPR/Cas9-mediated genome editing. (a-f)** Targeted gene disruption in and functional analyses of human Ramos B cells. **(a-b)** Schematic representation of the human TFEB gene locus indicating the targeted exons and including PAM sequence. The gRNA utilized for nucleofection is depicted on the left, the crRNA designed for electroporation is shown on the right. **(c-d)** Immunoblot verification of candidate mutant clones using anti-TFEB antibodies. Relative molecular masses of marker proteins are indicated on the left in kDa and anti- $\beta$ -actin staining was used to confirm equal protein loading. **(c)** Clones generated via nucleofection. **(d)** Clones created via the direct electroporation method. Clones used in the study hereafter are marked in bold. **(e)** BCR surface expression of selected TFEB-deficient clones was monitored by flow cytometry using anti-IgM antibodies. **(f)** Selected clones were examined for their BCR-induced  $\text{Ca}^{2+}$  mobilization capability by flow cytometry using the ratiometric  $\text{Ca}^{2+}$  indicator Indo-1 AM. After recording of basal  $\text{Ca}^{2+}$  levels for 30 s, Ramos B cells were BCR-stimulated with 10  $\mu\text{g}/\text{ml}$  anti-IgM  $\text{F}(\text{ab}')_2$  fragments and  $\text{Ca}^{2+}$  influx was monitored for a total of 300 s. **(g-k)** Targeted gene disruption in and functional analyses of murine WEHI-231 B cells. **(g-h)** Schematic representation of the murine *Tfeb* gene locus indicating the targeted exons and sequences (including PAM). Both crRNAs designed for electroporation are shown. **(i-j)** Immunoblot verification of the candidate mutant clones after the first round of screening. **(i)** Clones generated via the crRNA 'mTfeb.A'. **(j)** Clones created using the 'mTfeb.B' crRNA. TFEB-deficient clones used in the study hereafter are marked in bold. **(k)** Flow cytometric analysis of BCR surface expression of selected TFEB-deficient clones. Data in **(f)** and **(k)** are representative of n=3 independent experiments. Source data are provided as a Source Data file.

**a**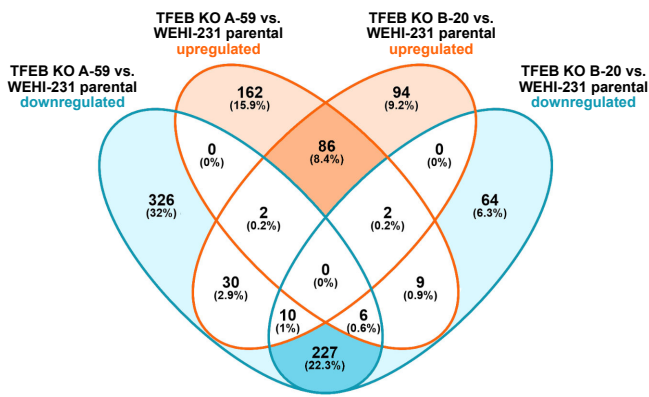**b**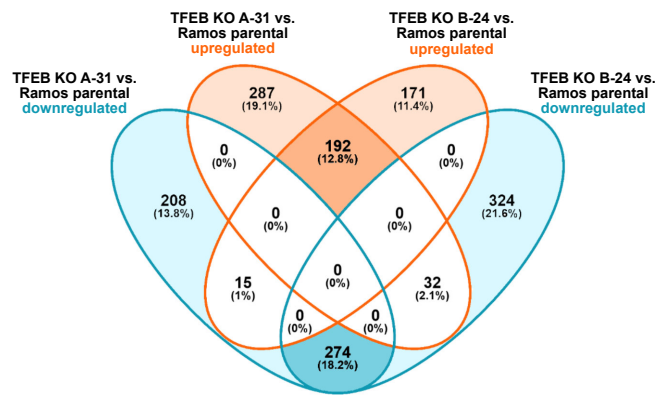**c**

**Ramos TFEB KO vs. Parental - downregulated**  
**Gene Ontology Analysis: Biological Process**

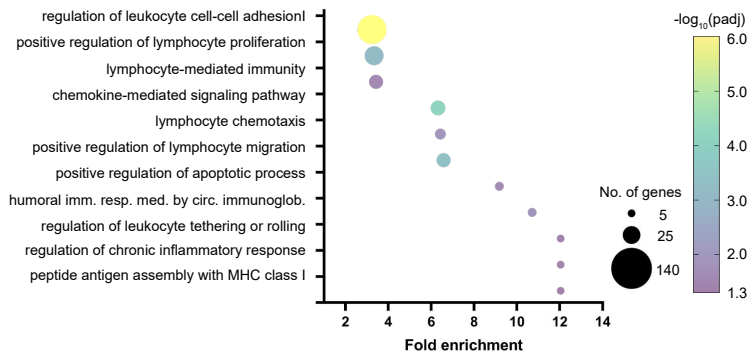**d**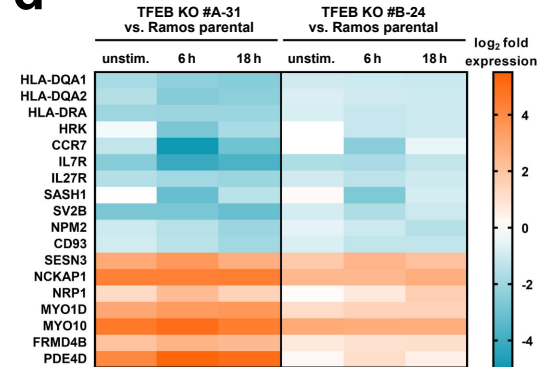**e**

**Ramos TFEB KO vs. Parental - downregulated**  
**Gene Ontology Analysis: Molecular Function**

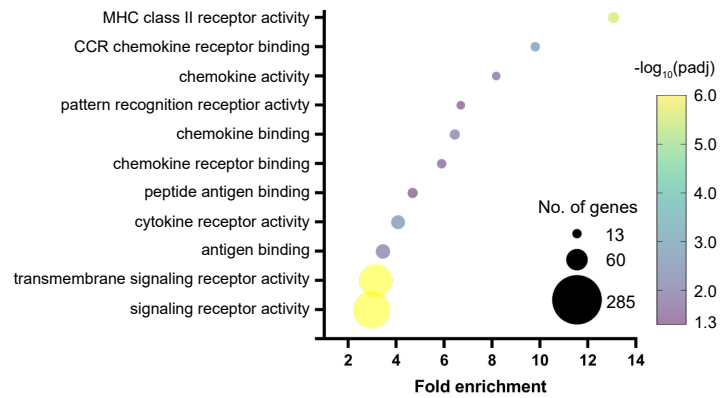**f**

**WEHI-231 TFEB KO vs. Parental - downregulated**  
**Gene Ontology Analysis: Molecular Function**

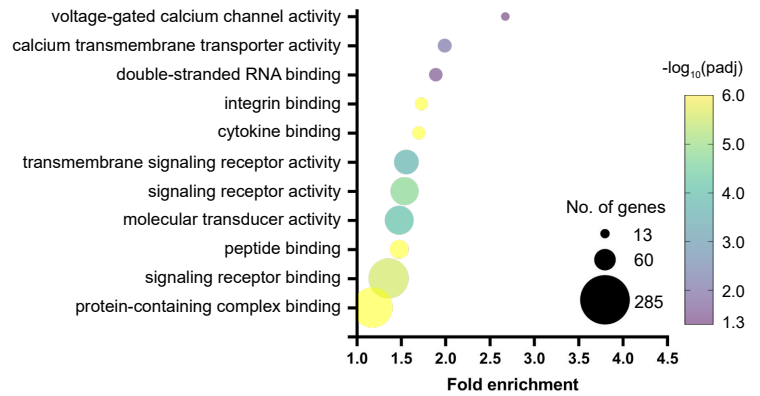**g**

**Ramos TFEB KO vs. Parental - downregulated**  
**Gene Ontology Analysis: Cellular Component**

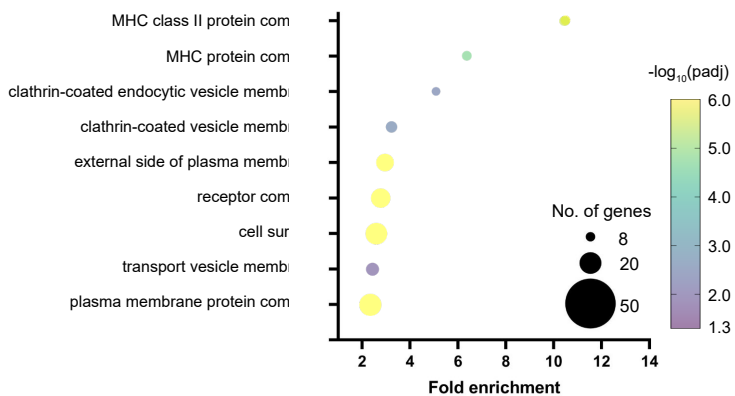**h**

**WEHI-231 TFEB KO vs. Parental - downregulated**  
**Gene Ontology Analysis: Cellular Component**

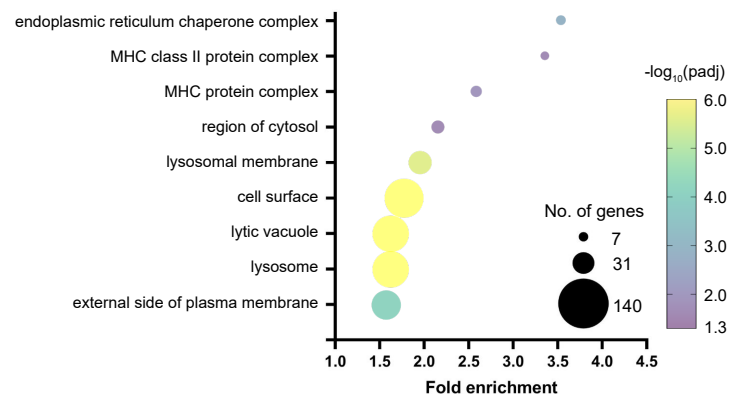

**Supplementary Fig. 6 | B-lymphoid TFEB target genes and gene ontology analysis in Ramos and WEHI-231 B cells.** Independent TFEB-deficient descendent clones of WEHI-231 **(a-b)** (#A-59 and #B-20) or Ramos (#A-31 and #B-24) **(c-f)** and the respective parental cells were left untreated or BCR-stimulated for 6 h or 18 h, lysed and subjected to RNA sequencing analysis. Data were derived from two independent experiments using two mutant clones per cell line. Numbers of differentially expressed genes (DEGs) defined by an FDR<0.01 and a log<sub>2</sub> fold change of >1 or <-1 are shown as Venn diagrams **(a-b)** depicting the overlap of down- and upregulated DEGs (marked in blue and orange, respectively) in BCR-stimulated WEHI-231 **(a)** and Ramos **(b)** B cells. Downregulated DEGs identified in both of the respective TFEB-depleted WEHI-231 and Ramos cells were subjected to gene ontology analysis. Enrichment of gene ontology terms related to ‘biological functions’ was computed using ‘GORilla’. Superordinate biological functions were summarized by removing redundant GO terms and visualized via ‘Revigo’. The number of genes assigned to the respective GO term is defined by the bubble size, while the adjusted FDR value is represented through a color gradient. **(c)** Selected highly-enriched GO terms reflecting ‘biological functions’ are depicted for TFEB-deficient versus parental Ramos cells. **(d)** Heatmap depicting log<sub>2</sub> fold changes of selected DEGs with immunological relevance for Ramos mutant clones as compared to the respective parental cells. **(e-f)** Gene ontology enrichment analysis of the molecular functions of identified downregulated DEGs in TFEB-deficient variants of Ramos **(e)** and WEHI-231 **(f)**. **(g-h)** Cellular components associated with identified downregulated DEGs as defined by gene ontology enrichment analysis in TFEB-deficient variants of Ramos **(g)** and WEHI-231 **(h)**. Source data are provided as a Source Data file.

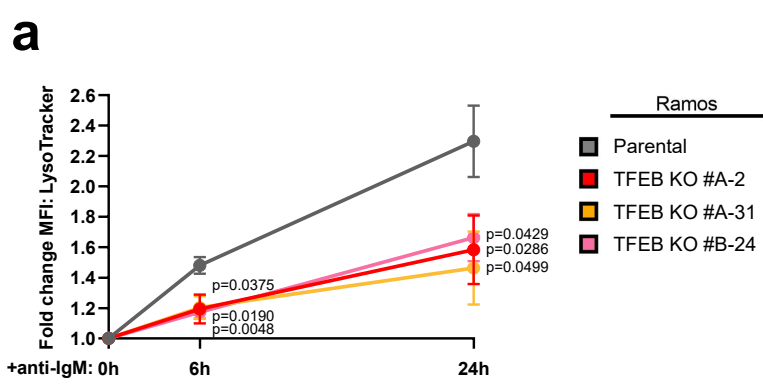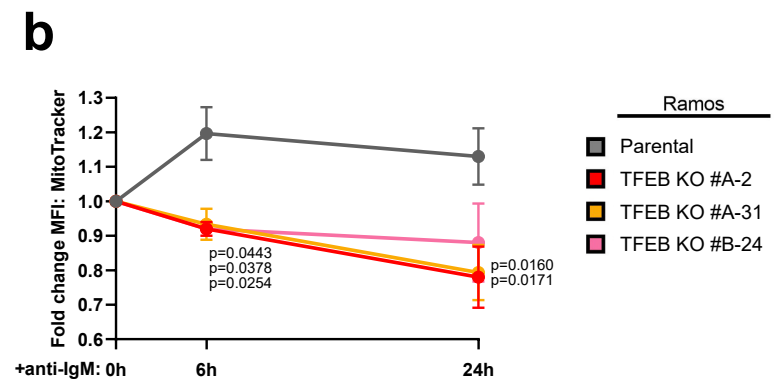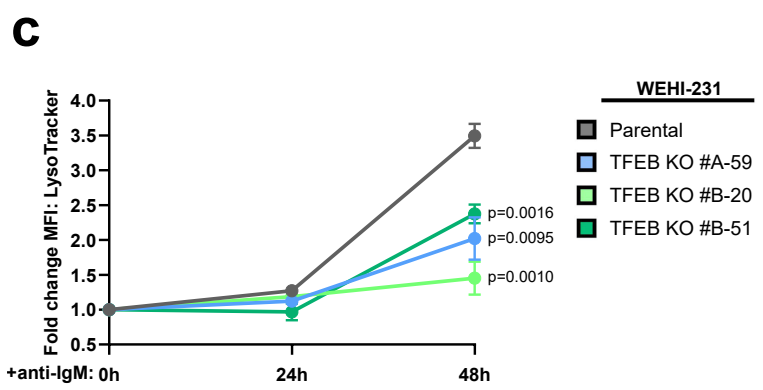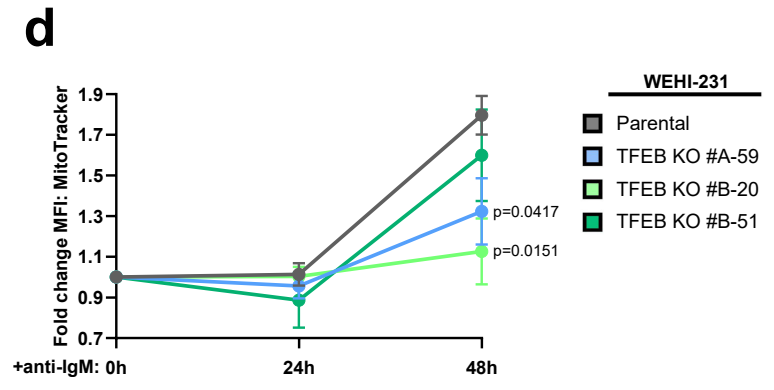

**Supplementary Fig. 7 | Lysosomal and mitochondrial adaptation requires TFEB.** Ramos (**a-b**) or WEHI-231 B cells (**c-d**) were left untreated or BCR-stimulated for the indicated time periods, and subsequently, lysosomal or mitochondrial masses normalized to the baseline levels were analyzed by flow cytometry using LysoTracker Deep Red (**a and c**) or MitoTracker Green (**b and d**), respectively. All data are presented as mean±SD of n=3 independent experiments. Statistical significances were calculated using two-way ANOVA and corrected for multiple testing via Dunnett's method. Source data are provided as a Source Data file.

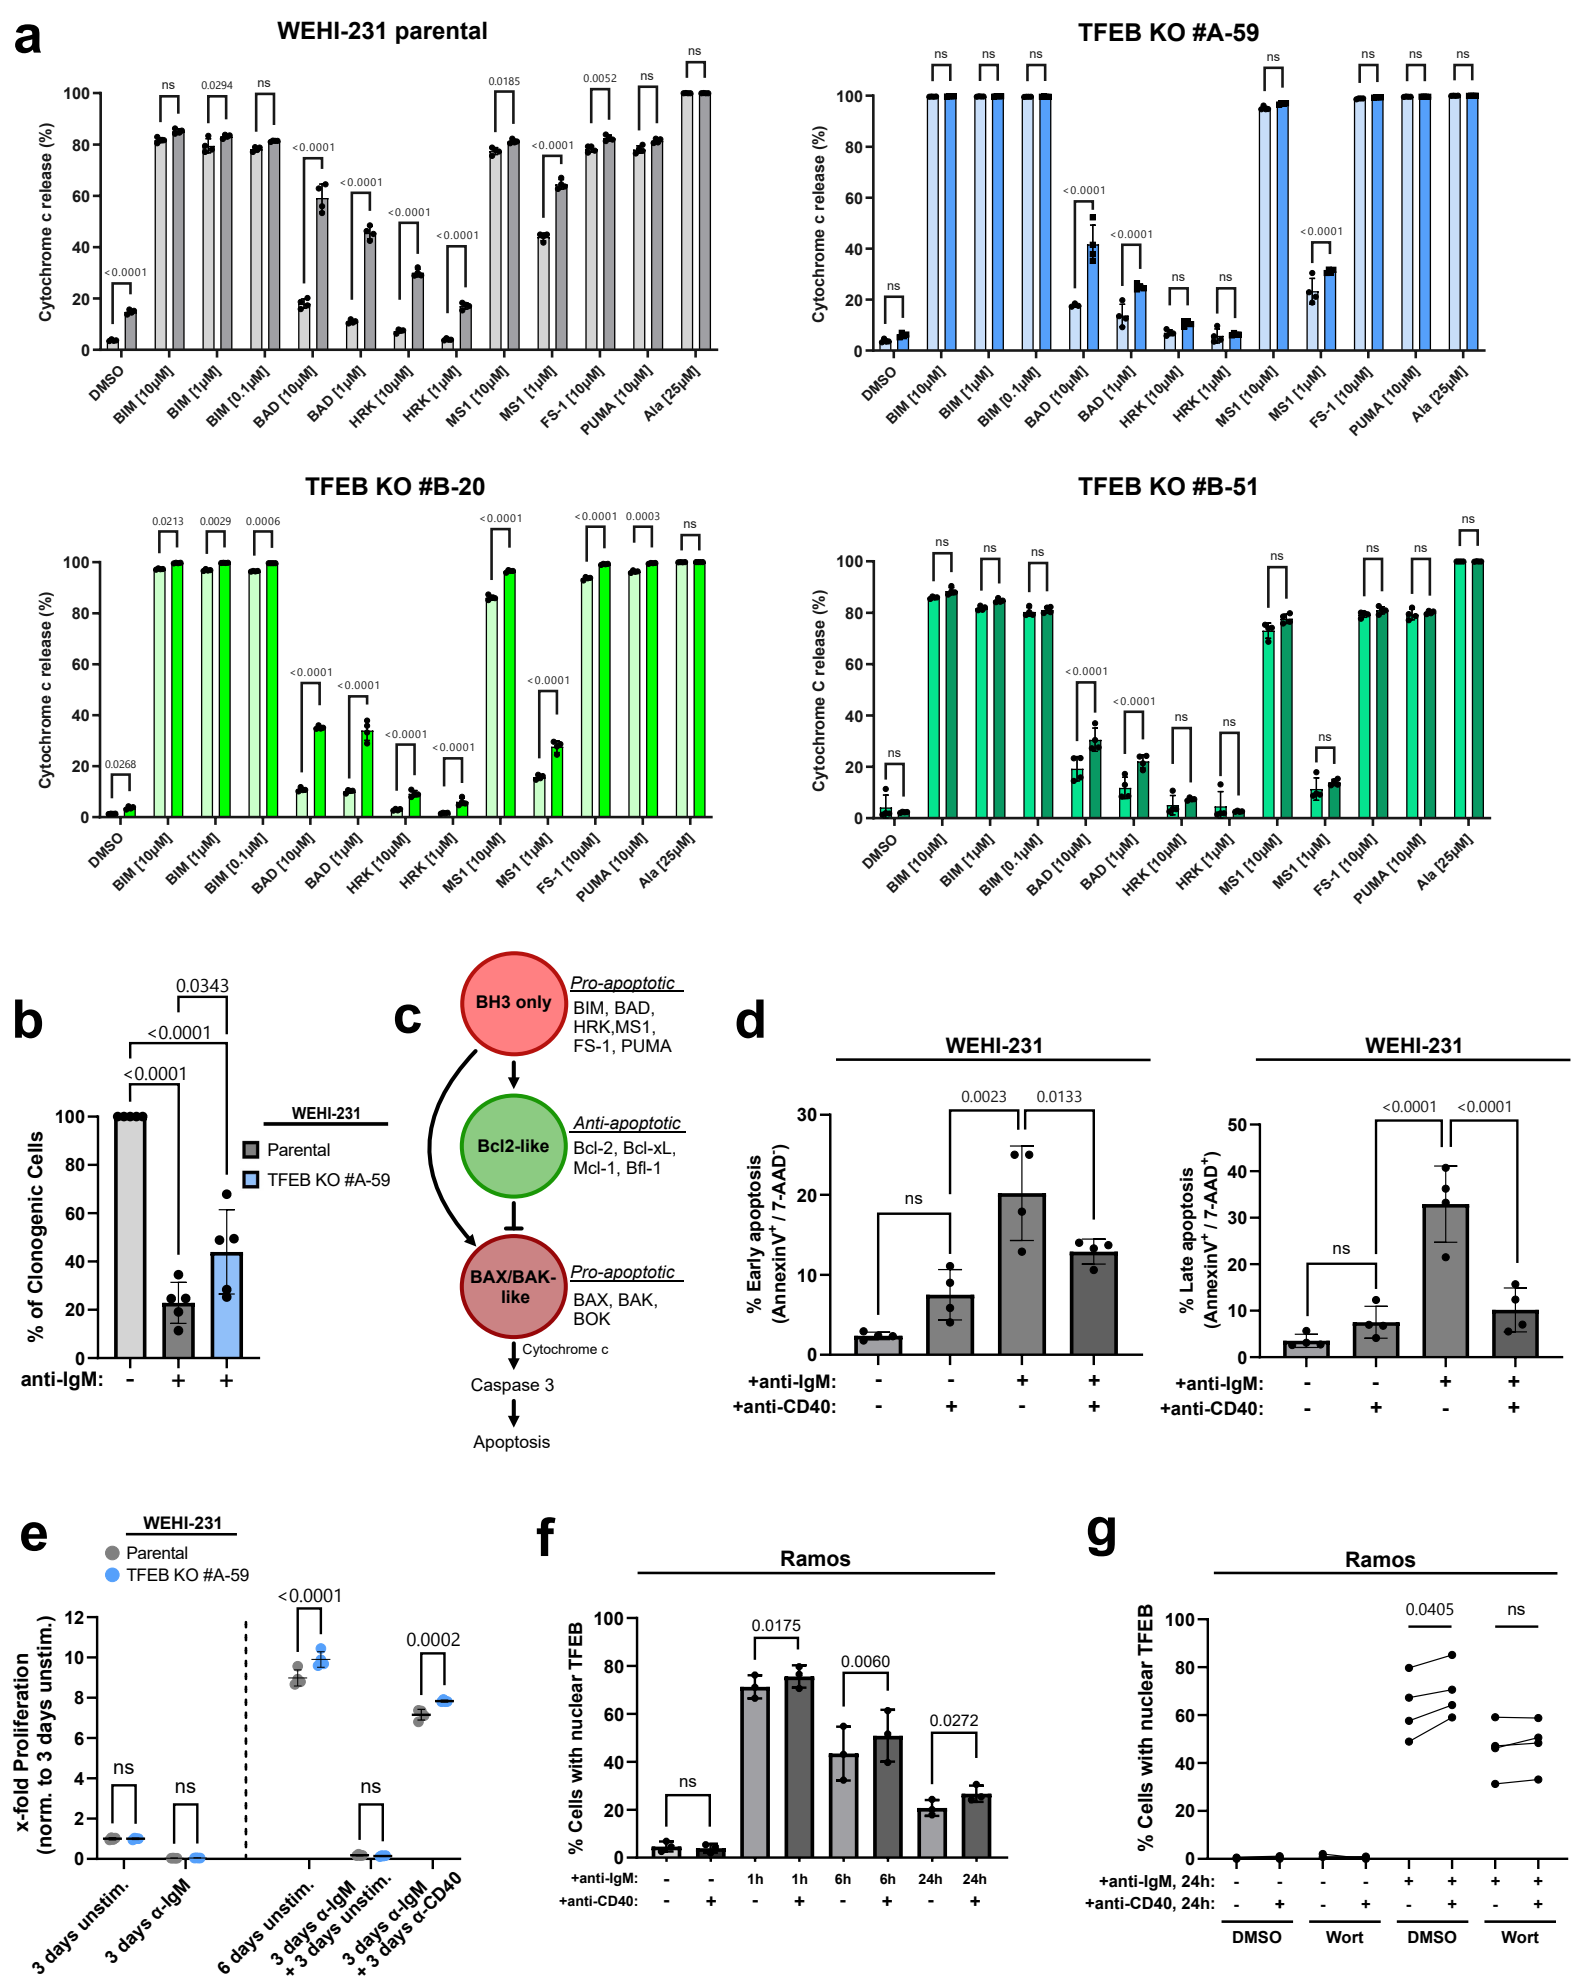

**Supplementary Fig. 8 | Assessment of TFEB-controlled apoptosis and CD40 rescue signals.** (a) BH3 profiling of parental cells and three independent TFEB-deficient WEHI-231 cell lines: Percentage of cytochrome c release upon incubation with the indicated relative molecular concentrations of agonistic BH3 peptides was assessed in resting and in BCR-stimulated cells (6 h). The BCR-induced sensitization for apoptosis is presented as the percentage of cytochrome c release of unstimulated (light) and stimulated (dark) cells for each cell line. The presented data is representative of n=3 independent experiments. The depicted data shows the mean%±SD of n=4 technical replicates. Statistical significances were calculated using two-way ANOVA and corrected for multiple testing via Dunnett's method. (b) Parental WEHI-231 and TFEB KO #A-59 cells were left untreated or BCR-ligated for 48 h. Single cell dilutions were subsequently seeded in 192 wells per condition and analyzed for clonogenic colony formation for 21 days. (c) Schematic depiction of apoptosis regulation through the Bcl-2 protein family pathway: Pro-apoptotic BH3-only proteins activate apoptosis-inducing Bax/Bak-like members through neutralization of anti-apoptotic Bcl-2 family proteins. (d) Resting and BCR-activated WEHI-231 B cells were incubated for 48 h in the presence or absence anti-CD40, and cells were monitored by flow cytometry using Annexin V-BV421 and 7-AAD co-staining. (e) Parental WEHI-231 and TFEB KO #A-59 cells were left untreated or stimulated with anti-IgM for 3 days. Medium was changed on day 3, and cells were left untreated or were rescued with anti-CD40 until day 6. Cells were harvested on day 3 and day 6 and stained with Annexin V and 7-AAD. The number of viable cells (Annexin V<sup>-</sup>/7-AAD<sup>-</sup>) was normalized to unstimulated parental cells on day 3. (f-g) Ramos B cells were left untreated, or were BCR-ligated for the indicated time periods in the absence or presence of anti-CD40. (g) Wortmannin was added 15 min before BCR ligation to antagonize PI3K. Subcellular distribution of TFEB was monitored by imaging flow cytometry using anti-TFEB antibodies and 7-AAD for visualization of the nucleus. Nuclear translocation of TFEB is depicted as percentage of cells with a similarity score of TFEB/7-AAD ≥1 (bottom). Data is presented as mean±SD of n=3 (f-g) or n=4 (b, d and e) independent experiments. Statistical significances were calculated using one-way ANOVA and corrected for multiple testing via Tukey's method. Source data are provided as a Source Data file.



**a**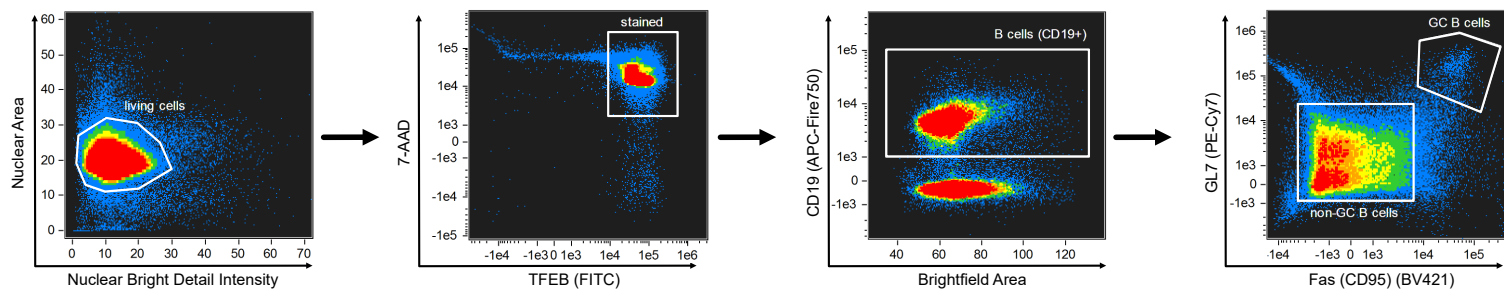**b**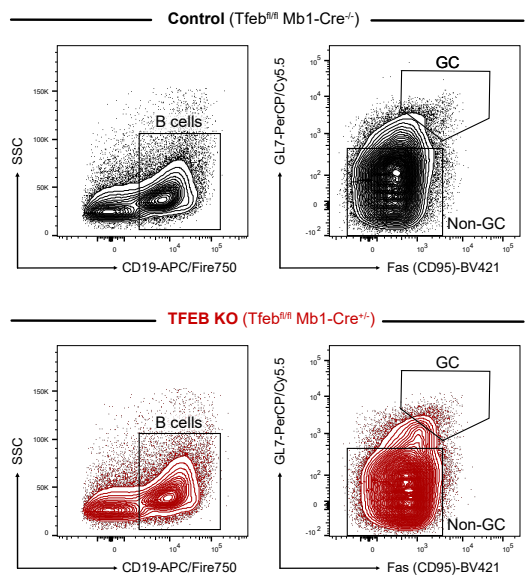**c**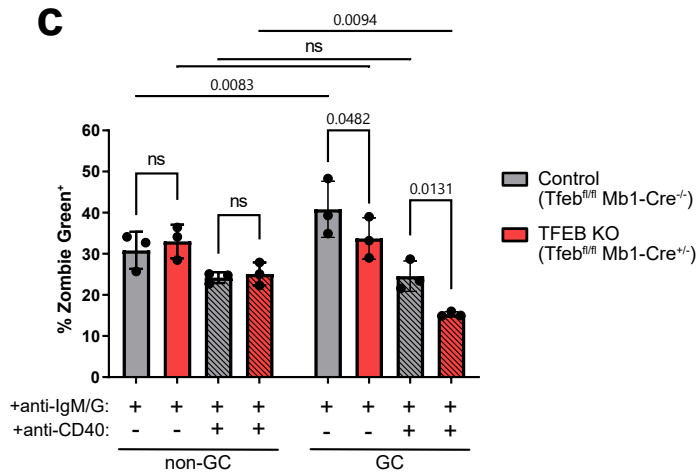

**Supplementary Fig. 9 | Analysis of BCR-induced apoptosis in GC B cells.** (a) Multi-color imaging flow cytometric gating strategy of germinal center B cells from mouse splenocytes: Upon exclusion of apoptotic and out-of-focus cells (via ‘Nuclear Area’ and ‘Nuclear Bright Detail Intensity’) from focused singlets, total B cells were gated as CD19<sup>+</sup>. Total B cells were distinguished by differential expression of the surface markers Fas (CD95) and GL7, with germinal center B cells being defined as CD19<sup>+</sup>Fas<sup>+</sup>GL7<sup>+</sup> and non-GC B cells as CD19<sup>+</sup>Fas<sup>-</sup>GL7<sup>-</sup>. (b-c) Splenocytes of TFE8-depleted and control mice were isolated and stimulated with anti-IgM/G and co-stimulated with CD40, as indicated, and stained for active caspase-3 and Zombie Green fluorescence. (b) Flow cytometric gating strategy: Singlet B cells were distinguished by expression of CD19<sup>+</sup>. Germinal center B cells were gated as CD19<sup>+</sup>Fas<sup>+</sup>GL7<sup>+</sup>, whereas non-GC B cells were defined as CD19<sup>+</sup>Fas<sup>-</sup>GL7<sup>-</sup>. (c) GC and non-GC B cells were gated for high Zombie Green fluorescence. Percentage of Zombie Green<sup>+</sup> B cells of parental GC or non-GC B cells, respectively, are depicted as mean±SD of n=3 independent experiments. Statistical significances were computed using RM two-way ANOVA and Fisher’s LSD test. Source data are provided as a Source Data file.
